# Supplementary material for: Bonding in homoleptic iron carbonyl cluster cations: a combined infrared photodissociation spectroscopic and theoretical study
Source: Royal Society of Chemistry journal article supplement (doi:10.1039/c2sc20947k), 2012-01-01
Supplement: c2sc20947k.pdf [file c2sc20947k.pdf]

## Supporting Information

### Bonding in Homoleptic Iron Carbonyl Cluster Cations: A Combined Infrared Photodissociation

#### Spectroscopic and Theoretical Study

Guanjun Wang<sup>1</sup>, Jiemin Cui<sup>1</sup>, Chaoxian Chi<sup>1</sup>, Xiaojie Zhou<sup>1</sup>, Zhen Hua Li<sup>1\*</sup>, Xiaopeng Xing<sup>2</sup>, Mingfei

Zhou<sup>1\*</sup>

<sup>1</sup> Department of Chemistry, Shanghai Key Laboratory of Molecular Catalysts and Innovative Materials,

Fudan University, Shanghai 200433, China. Fax: (+86) 21-6564-3532, E-mail: [mfzhou@fudan.edu.cn](mailto:mfzhou@fudan.edu.cn)

(Zhou), [lizhenhua@fudan.edu.cn](mailto:lizhenhua@fudan.edu.cn) (Li); <sup>2</sup> Graduate University of Chinese Academy of Sciences, College of

Materials Sciences and Opto-Electronic Technology, Beijing 100049, China

Table S1. Harmonic vibrational frequencies (cm<sup>-1</sup>) and IR intensities (km/mol) of Fe(CO)<sub>5</sub><sup>+</sup> and Fe(CO)<sub>6</sub><sup>+</sup>.

| Freq.                            | IR Int. | Freq.                            | IR Int. |
|----------------------------------|---------|----------------------------------|---------|
| Fe(CO) <sub>6</sub> <sup>+</sup> |         | Fe(CO) <sub>5</sub> <sup>+</sup> |         |
| 26.2                             | 0.2     | 47.7                             | 0       |
| 26.2                             | 0.2     | 80.0                             | 0       |
| 49.0                             | 0.0     | 80.0                             | 0       |
| 50.6                             | 3.0     | 98.6                             | 0       |
| 78.2                             | 0.1     | 103.2                            | 1.6     |
| 78.2                             | 0.1     | 103.2                            | 1.6     |
| 86.0                             | 0.4     | 107.1                            | 1.1     |
| 86.0                             | 0.4     | 316.9                            | 0.1     |
| 98.5                             | 0.0     | 321.1                            | 1.5     |
| 102.7                            | 1.3     | 338.5                            | 0       |
| 102.7                            | 1.3     | 343.3                            | 0       |
| 103.9                            | 1.5     | 361.1                            | 6.4     |
| 307.8                            | 2.9     | 385.6                            | 26      |
| 315.2                            | 0.0     | 385.6                            | 26      |
| 315.2                            | 0.0     | 415.3                            | 0       |
| 337.6                            | 0.0     | 470.0                            | 2.8     |
| 340.4                            | 0.0     | 470.0                            | 2.8     |
| 357.7                            | 3.9     | 532.6                            | 56.0    |
| 386.2                            | 25.7    | 571.9                            | 79.2    |
| 386.2                            | 25.7    | 571.9                            | 79.2    |
| 422.8                            | 0.0     | 573.8                            | 56.0    |
| 463.9                            | 2.9     | 2197.0                           | 954.6   |
| 463.9                            | 2.9     | 2197.0                           | 954.6   |
| 530.6                            | 0.0     | 2202.9                           | 416.5   |
| 571.9                            | 55.9    | 2211.4                           | 0.0     |

|        |       |        |     |
|--------|-------|--------|-----|
| 572.6  | 81.3  | 2256.2 | 0.6 |
| 572.6  | 81.3  |        |     |
| 2192.5 | 954.3 |        |     |
| 2192.5 | 954.3 |        |     |
| 2198.3 | 434.0 |        |     |
| 2207.3 | 0.0   |        |     |
| 2244.5 | 64.4  |        |     |
| 2253.1 | 1.9   |        |     |

Table S2: Harmonic vibrational frequencies ( $\text{cm}^{-1}$ ) and IR intensities ( $\text{km/mol}$ ) of  $\text{Fe}_2(\text{CO})_8^+$ .

| $\text{C}_s, {}^4\text{A}''$ |         | $\text{C}_{2v}, {}^2\text{B}_1$ |         | $\text{D}_{2d}, {}^2\text{A}$ |         | $\text{C}_{2v}, {}^4\text{B}_1$ |         |
|------------------------------|---------|---------------------------------|---------|-------------------------------|---------|---------------------------------|---------|
| Freq.                        | IR Int. | Freq.                           | IR Int. | Freq.                         | IR Int. | Freq.                           | IR Int. |
| 5.5                          | 0.0     | 24.3                            | 0.7     | -15.0                         | 0.3     | -154.5                          | 0.0     |
| 36.9                         | 0.3     | 31.5                            | 0.0     | -11.2                         | 0.0     | 35.8                            | 0.0     |
| 38.8                         | 0.4     | 36.5                            | 0.1     | 42.6                          | 1.0     | 36.8                            | 0.0     |
| 42.3                         | 0.1     | 41.2                            | 0.3     | 63.5                          | 0.9     | 43.1                            | 0.4     |
| 51.3                         | 0.0     | 65.9                            | 1.8     | 68.2                          | 1.9     | 72.8                            | 0.0     |
| 57.9                         | 0.0     | 70.9                            | 0.6     | 70.8                          | 1.3     | 75.9                            | 0.0     |
| 62.7                         | 0.0     | 80.5                            | 0.7     | 72.4                          | 0.0     | 80.7                            | 0.3     |
| 69.8                         | 1.9     | 81.2                            | 0.0     | 79.8                          | 0.0     | 83.3                            | 0.0     |
| 69.9                         | 1.2     | 81.9                            | 0.2     | 80.5                          | 0.1     | 85.1                            | 2.6     |
| 91.3                         | 0.0     | 86.9                            | 0.0     | 85.1                          | 0.6     | 91.0                            | 0.3     |
| 91.6                         | 0.0     | 91.4                            | 0.5     | 90.4                          | 0.8     | 97.9                            | 0.6     |
| 102.1                        | 0.0     | 93.4                            | 0.8     | 91.2                          | 0.5     | 98.9                            | 1.6     |
| 108.5                        | 1.5     | 99.1                            | 0.8     | 92.6                          | 0.0     | 114.4                           | 0.9     |
| 112.4                        | 0.4     | 104.8                           | 0.3     | 113.1                         | 0.4     | 120.2                           | 0.0     |
| 112.6                        | 0.6     | 117.6                           | 1.1     | 115.3                         | 1.2     | 200.8                           | 0.1     |
| 147.4                        | 3.3     | 178.4                           | 0.9     | 183.6                         | 2.0     | 204.1                           | 5.5     |
| 237.6                        | 35.9    | 324.5                           | 0.9     | 303.4                         | 0.1     | 249.4                           | 0.0     |
| 251.8                        | 0.6     | 336.6                           | 1.4     | 320.7                         | 0.0     | 323.4                           | 0.2     |
| 279.0                        | 18.3    | 340.4                           | 0.0     | 349.8                         | 8.8     | 335.7                           | 1.5     |
| 280.2                        | 1.0     | 346.0                           | 3.5     | 351.9                         | 0.0     | 335.8                           | 6.6     |
| 298.1                        | 23.4    | 352.6                           | 38.5    | 354.3                         | 4.2     | 339.1                           | 0.9     |
| 307.2                        | 1.7     | 353.0                           | 0.2     | 355.0                         | 0.0     | 347.5                           | 0.0     |
| 350.7                        | 0.6     | 355.3                           | 0.0     | 358.3                         | 66.7    | 348.7                           | 171.8   |
| 362.2                        | 0.0     | 366.5                           | 14.7    | 380.9                         | 0.2     | 362.6                           | 0.2     |
| 371.2                        | 0.0     | 384.0                           | 35.7    | 392.9                         | 9.5     | 366.4                           | 0.0     |
| 375.0                        | 0.0     | 407.1                           | 1.4     | 398.4                         | 6.5     | 368.1                           | 12.8    |
| 376.0                        | 0.0     | 416.1                           | 2.0     | 413.5                         | 0.3     | 370.0                           | 25.1    |
| 386.5                        | 2.9     | 426.3                           | 8.3     | 414.1                         | 37.0    | 372.7                           | 70.8    |
| 398.4                        | 5.7     | 461.9                           | 0.0     | 461.6                         | 4.0     | 386.0                           | 24.0    |
| 399.0                        | 0.5     | 462.7                           | 14.3    | 473.4                         | 47.9    | 422.7                           | 3.5     |
| 420.4                        | 0.0     | 468.8                           | 5.6     | 480.2                         | 5.8     | 436.9                           | 187.7   |
| 432.3                        | 7.3     | 477.6                           | 1.3     | 485.5                         | 0.0     | 443.1                           | 0.0     |
| 453.1                        | 14.6    | 504.7                           | 183.2   | 491.0                         | 0.0     | 483.1                           | 4.2     |
| 453.3                        | 14.3    | 508.3                           | 0.0     | 500.9                         | 108.1   | 504.0                           | 0.0     |

|        |        |        |        |        |        |        |        |
|--------|--------|--------|--------|--------|--------|--------|--------|
| 524.0  | 10.0   | 510.6  | 39.7   | 515.7  | 3.7    | 509.2  | 56.5   |
| 524.9  | 10.4   | 545.3  | 84.9   | 535.3  | 61.0   | 512.2  | 78.3   |
| 557.9  | 0.1    | 550.2  | 50.6   | 544.1  | 102.2  | 516.4  | 0.0    |
| 617.5  | 94.3   | 572.0  | 109.6  | 555.7  | 85.1   | 524.8  | 41.9   |
| 618.4  | 97.4   | 577.0  | 60.2   | 561.6  | 50.1   | 535.2  | 23.3   |
| 642.0  | 250.4  | 607.2  | 41.8   | 587.6  | 51.4   | 546.2  | 16.2   |
| 2130.2 | 480.8  | 2124.3 | 614.2  | 2129.3 | 646.6  | 2024.0 | 743.8  |
| 2131.1 | 573.0  | 2127.2 | 894.2  | 2129.6 | 910.4  | 2040.7 | 126.2  |
| 2140.4 | 57.1   | 2140.3 | 15.2   | 2136.5 | 98.8   | 2161.5 | 0.2    |
| 2156.7 | 1131.3 | 2153.5 | 3.6    | 2153.9 | 0.8    | 2164.0 | 0.0    |
| 2163.5 | 1319.7 | 2161.6 | 1043.5 | 2169.3 | 933.3  | 2165.8 | 1196.2 |
| 2165.7 | 170.5  | 2170.4 | 783.9  | 2170.6 | 708.9  | 2170.2 | 1147.9 |
| 2199.0 | 838.0  | 2179.1 | 1416.1 | 2179.0 | 1530.6 | 2184.0 | 1534.1 |
| 2226.3 | 15.6   | 2217.2 | 0.0    | 2217.5 | 10.5   | 2215.7 | 16.3   |

Table S3: Harmonic vibrational frequencies ( $\text{cm}^{-1}$ ) and IR intensities ( $\text{km/mol}$ ) of  $\text{Fe}_2(\text{CO})_9^+$ .

| $\text{C}_{2v}, {}^1\text{B}_1$ |         | $\text{C}_{4v}, {}^2\text{A}_1$ |         | $\text{C}_{4v}, {}^2\text{A}_1$ |         |
|---------------------------------|---------|---------------------------------|---------|---------------------------------|---------|
| Freq.                           | IR Int. | Freq.                           | IR Int. | Freq.                           | IR Int. |
| 12.9                            | 0.1     | 33.8                            | 0.0     | -9.6                            | 0.0     |
| 16.6                            | 0.0     | 52.0                            | 0.0     | 40.0                            | 0.0     |
| 35.4                            | 0.1     | 52.4                            | 0.0     | 40.7                            | 0.0     |
| 64.9                            | 0.3     | 52.4                            | 0.0     | 40.7                            | 0.0     |
| 72.0                            | 0.1     | 59.5                            | 0.0     | 70.1                            | 0.1     |
| 72.3                            | 0.0     | 60.5                            | 0.0     | 70.1                            | 0.1     |
| 72.5                            | 0.1     | 60.5                            | 0.0     | 82.6                            | 7.1     |
| 92.4                            | 0.5     | 80.0                            | 2.1     | 86.3                            | 0.0     |
| 93.3                            | 0.8     | 93.0                            | 0.1     | 96.0                            | 1.3     |
| 93.8                            | 0.0     | 93.0                            | 0.1     | 96.0                            | 1.3     |
| 96.8                            | 1.0     | 98.6                            | 1.4     | 98.2                            | 0.0     |
| 97.5                            | 0.7     | 98.6                            | 1.4     | 99.7                            | 0.3     |
| 106.5                           | 0.2     | 99.9                            | 0.0     | 99.7                            | 0.3     |
| 109.1                           | 0.3     | 104.5                           | 0.0     | 102.4                           | 0.0     |
| 112.1                           | 0.7     | 111.0                           | 0.6     | 110.6                           | 1.7     |
| 113.1                           | 0.5     | 111.0                           | 0.6     | 112.2                           | 0.4     |
| 116.7                           | 0.0     | 114.5                           | 1.0     | 112.2                           | 0.4     |
| 140.0                           | 2.5     | 125.4                           | 6.4     | 125.5                           | 1.9     |
| 319.0                           | 1.4     | 348.6                           | 0.0     | 343.2                           | 0.0     |
| 345.8                           | 0.0     | 363.3                           | 0.0     | 360.8                           | 0.0     |
| 361.1                           | 0.0     | 367.4                           | 0.0     | 365.2                           | 0.0     |
| 369.1                           | 0.1     | 369.7                           | 0.1     | 368.4                           | 0.3     |
| 372.2                           | 12.4    | 369.7                           | 0.1     | 368.4                           | 0.3     |
| 380.5                           | 1.3     | 370.0                           | 27.9    | 369.3                           | 0.0     |
| 381.4                           | 36.9    | 377.2                           | 0.0     | 370.8                           | 30.7    |
| 382.2                           | 0.6     | 385.4                           | 0.2     | 377.8                           | 0.3     |
| 382.9                           | 0.0     | 385.4                           | 0.2     | 377.8                           | 0.3     |
| 388.3                           | 0.5     | 395.6                           | 9.8     | 396.3                           | 11.4    |
| 396.8                           | 0.1     | 412.3                           | 30.8    | 412.1                           | 26.4    |
| 422.1                           | 0.0     | 412.3                           | 30.8    | 412.1                           | 26.4    |
| 429.1                           | 5.0     | 418.9                           | 0.0     | 420.4                           | 0.0     |
| 443.9                           | 14.6    | 438.1                           | 0.0     | 438.0                           | 7.8     |
| 451.0                           | 16.1    | 438.2                           | 6.3     | 442.3                           | 0.0     |
| 460.6                           | 8.7     | 452.3                           | 11.6    | 451.9                           | 10.8    |
| 466.9                           | 32.8    | 452.3                           | 11.6    | 451.9                           | 10.8    |
| 526.4                           | 7.8     | 529.6                           | 10.5    | 531.9                           | 7.3     |
| 530.8                           | 0.0     | 529.6                           | 10.5    | 531.9                           | 7.3     |
| 532.1                           | 0.2     | 549.1                           | 0.0     | 548.3                           | 0.0     |
| 555.3                           | 1.0     | 555.8                           | 0.0     | 555.2                           | 0.0     |
| 555.6                           | 50.0    | 573.9                           | 39.8    | 569.5                           | 25.0    |
| 575.1                           | 28.8    | 591.5                           | 42.9    | 582.7                           | 52.9    |
| 587.1                           | 187.9   | 591.5                           | 42.9    | 582.7                           | 52.9    |
| 614.3                           | 95.6    | 620.1                           | 101.7   | 617.0                           | 99.3    |

|        |        |        |        |        |        |
|--------|--------|--------|--------|--------|--------|
| 617.4  | 83.2   | 620.1  | 101.7  | 617.0  | 99.3   |
| 638.7  | 202.4  | 642.6  | 254.5  | 643.5  | 263.8  |
| 2124.9 | 142.5  | 2124.5 | 192.9  | 2123.5 | 225.2  |
| 2140.0 | 9.5    | 2124.5 | 192.9  | 2123.5 | 225.2  |
| 2145.6 | 4.0    | 2138.7 | 0.0    | 2135.7 | 0.0    |
| 2152.7 | 1708.5 | 2150.2 | 18.6   | 2149.2 | 27.0   |
| 2155.3 | 1727.7 | 2155.4 | 1794.3 | 2159.1 | 1745.9 |
| 2156.1 | 0.0    | 2155.4 | 1794.3 | 2159.1 | 1745.9 |
| 2168.4 | 57.6   | 2167.3 | 0.0    | 2172.2 | 0.0    |
| 2185.0 | 1333.5 | 2181.3 | 1259.4 | 2179.7 | 1415.3 |
| 2226.0 | 27.1   | 2228.2 | 0.5    | 2229.0 | 4.6    |

Table S4: Harmonic vibrational frequencies ( $\text{cm}^{-1}$ ) and IR intensities ( $\text{km/mol}$ ) of  $\text{Fe}_3(\text{CO})_{12}^+$ .

| $C_1, ^4A$ |         | $C_1, ^4A$ |         | $C_2, ^2A$ |         | $C_{2v}, ^4B_1$ |         | $C_s, ^2A''$ |         | $C_s, ^2A'$ |         | $D_{3h}, ^2A$ |         |
|------------|---------|------------|---------|------------|---------|-----------------|---------|--------------|---------|-------------|---------|---------------|---------|
| Freq.      | IR Int. | Freq.      | IR Int. | Freq.      | IR Int. | Freq.           | IR Int. | Freq.        | IR Int. | Freq.       | IR Int. | Freq.         | IR Int. |
| 2.1        | 0.0     | 17.0       | 0.1     | 20.3       | 0.1     | 21.0            | 0.0     | 9.3          | 0.0     | 39.8        | 0.0     | -377.6        | 51.2    |
| 25.2       | 0.0     | 20.4       | 0.0     | 40.8       | 0.0     | 23.9            | 0.0     | 25.0         | 0.0     | 44.5        | 0.2     | -51.4         | 27.4    |
| 27.9       | 0.0     | 28.7       | 0.0     | 46.9       | 0.0     | 29.4            | 0.0     | 33.2         | 0.1     | 55.6        | 0.1     | 55.6          | 0.1     |
| 35.0       | 0.0     | 41.4       | 0.3     | 50.4       | 0.1     | 35.5            | 0.0     | 33.5         | 0.1     | 58.9        | 0.5     | 55.7          | 0.1     |
| 38.1       | 0.1     | 41.5       | 0.1     | 53.9       | 0.0     | 42.7            | 0.1     | 40.8         | 0.0     | 60.1        | 0.0     | 56.9          | 0.0     |
| 44.7       | 0.1     | 45.4       | 0.1     | 64.9       | 0.2     | 44.3            | 0.1     | 44.7         | 0.2     | 63.1        | 0.0     | 60.2          | 0.6     |
| 47.3       | 0.1     | 48.0       | 0.3     | 65.9       | 0.4     | 65.9            | 0.3     | 58.5         | 0.1     | 70.4        | 0.0     | 67.6          | 0.2     |
| 50.0       | 0.1     | 53.2       | 0.2     | 69.2       | 0.0     | 69.4            | 1.3     | 65.2         | 0.2     | 71.0        | 2.9     | 68.3          | 0.0     |
| 52.1       | 0.1     | 53.8       | 0.1     | 78.3       | 0.0     | 75.0            | 1.1     | 72.2         | 0.0     | 80.3        | 0.1     | 87.1          | 16.6    |
| 61.0       | 0.2     | 60.1       | 0.3     | 79.8       | 0.5     | 75.6            | 0.8     | 72.9         | 0.6     | 86.8        | 1.2     | 88.3          | 0.1     |
| 62.2       | 1.5     | 67.3       | 0.1     | 82.1       | 0.0     | 79.2            | 0.1     | 81.2         | 0.1     | 86.9        | 0.0     | 88.7          | 10.5    |
| 63.7       | 0.0     | 71.9       | 0.0     | 82.9       | 0.0     | 79.8            | 0.5     | 84.8         | 1.3     | 95.3        | 0.9     | 89.0          | 0.0     |
| 67.9       | 0.0     | 79.3       | 1.8     | 86.4       | 2.0     | 82.3            | 0.0     | 84.8         | 1.3     | 96.0        | 1.5     | 94.3          | 1.4     |
| 87.4       | 1.3     | 83.7       | 0.6     | 88.4       | 0.7     | 87.4            | 0.1     | 86.5         | 0.5     | 98.7        | 1.6     | 95.4          | 2.1     |
| 89.7       | 0.8     | 85.2       | 0.1     | 93.7       | 0.0     | 88.0            | 0.0     | 87.5         | 0.1     | 99.6        | 1.3     | 98.4          | 1.0     |
| 91.4       | 0.0     | 90.2       | 15.0    | 98.7       | 0.7     | 89.6            | 0.0     | 89.4         | 0.5     | 103.9       | 0.5     | 100.9         | 0.0     |
| 91.7       | 0.2     | 92.8       | 0.9     | 101.4      | 0.2     | 92.5            | 1.1     | 91.3         | 0.2     | 105.4       | 0.1     | 101.4         | 0.1     |
| 95.8       | 0.2     | 97.6       | 0.2     | 103.5      | 0.3     | 92.9            | 0.4     | 91.9         | 1.2     | 106.8       | 0.2     | 106.1         | 1.6     |
| 104.7      | 5.4     | 99.6       | 0.0     | 105.7      | 0.0     | 98.9            | 1.0     | 95.4         | 1.0     | 109.1       | 1.6     | 110.1         | 19.3    |
| 105.2      | 2.2     | 103.4      | 0.3     | 106.8      | 0.3     | 99.6            | 0.4     | 100.7        | 4.3     | 111.3       | 0.1     | 118.1         | 0.0     |
| 108.4      | 0.2     | 105.0      | 0.0     | 110.7      | 0.1     | 102.8           | 1.5     | 102.5        | 0.2     | 118.8       | 0.0     | 120.8         | 0.0     |
| 110.6      | 1.5     | 109.1      | 0.5     | 111.5      | 0.0     | 105.7           | 0.0     | 105.9        | 0.7     | 120.1       | 0.0     | 125.4         | 0.9     |
| 113.0      | 0.7     | 111.1      | 0.7     | 118.6      | 0.0     | 108.5           | 0.7     | 110.3        | 0.1     | 124.9       | 0.1     | 128.9         | 0.0     |
| 114.9      | 0.1     | 111.3      | 1.3     | 120.2      | 0.1     | 109.7           | 0.1     | 132.0        | 0.2     | 131.3       | 0.4     | 152.8         | 0.2     |
| 116.4      | 0.1     | 113.6      | 0.2     | 131.7      | 0.0     | 127.6           | 1.3     | 135.7        | 9.6     | 138.0       | 3.8     | 159.3         | 17.1    |
| 126.6      | 6.6     | 115.5      | 1.3     | 142.1      | 0.5     | 132.3           | 0.2     | 140.3        | 0.1     | 155.0       | 0.2     | 187.9         | 2.2     |
| 129.8      | 0.4     | 118.9      | 0.1     | 147.4      | 0.0     | 191.5           | 3.0     | 146.3        | 7.6     | 225.5       | 16.0    | 203.3         | 18.3    |
| 288.3      | 14.9    | 312.5      | 0.0     | 349.4      | 6.3     | 306.6           | 6.9     | 312.9        | 3.3     | 337.5       | 8.1     | 212.6         | 36.6    |
| 297.7      | 46.6    | 339.8      | 5.9     | 349.5      | 0.9     | 327.9           | 1.2     | 327.7        | 1.7     | 341.7       | 31.9    | 244.9         | 62.0    |
| 315.0      | 13.9    | 361.8      | 0.0     | 355.6      | 0.9     | 336.2           | 3.3     | 330.2        | 0.3     | 354.2       | 11.4    | 293.2         | 106.8   |
| 321.7      | 0.0     | 363.0      | 0.1     | 361.5      | 2.1     | 337.4           | 0.0     | 337.4        | 0.4     | 362.7       | 0.3     | 298.1         | 13.1    |
| 338.6      | 6.5     | 363.6      | 0.0     | 361.5      | 0.3     | 345.3           | 0.0     | 338.9        | 0.0     | 378.2       | 0.0     | 332.7         | 1.1     |
| 363.5      | 0.1     | 368.8      | 1.4     | 371.6      | 2.4     | 354.9           | 0.9     | 350.8        | 0.5     | 379.8       | 42.6    | 368.5         | 0.3     |
| 365.5      | 0.0     | 375.1      | 0.1     | 372.4      | 0.4     | 355.6           | 4.1     | 352.8        | 4.8     | 384.1       | 37.7    | 369.2         | 0.0     |
| 367.6      | 0.4     | 375.1      | 0.5     | 377.1      | 2.0     | 363.0           | 0.0     | 366.6        | 0.2     | 385.9       | 1.1     | 379.3         | 8.2     |
| 369.6      | 0.6     | 375.8      | 0.0     | 388.0      | 3.5     | 366.8           | 9.7     | 370.4        | 14.1    | 388.4       | 22.3    | 379.4         | 2.8     |
| 375.8      | 0.1     | 384.3      | 18.0    | 390.4      | 30.1    | 370.0           | 1.8     | 370.4        | 13.2    | 389.7       | 0.6     | 390.1         | 0.1     |
| 376.2      | 0.2     | 386.0      | 1.1     | 394.0      | 11.7    | 370.1           | 1.6     | 371.3        | 37.7    | 394.8       | 0.3     | 398.4         | 0.0     |
| 377.5      | 0.3     | 395.0      | 62.5    | 399.5      | 1.1     | 372.8           | 64.1    | 374.1        | 48.3    | 402.0       | 1.2     | 398.7         | 3.3     |
| 377.7      | 0.2     | 397.5      | 14.5    | 401.5      | 26.2    | 378.0           | 0.1     | 376.5        | 15.1    | 402.7       | 1.1     | 399.3         | 0.0     |
| 401.3      | 12.4    | 399.4      | 0.8     | 404.6      | 9.6     | 379.8           | 14.7    | 381.2        | 3.8     | 404.7       | 79.9    | 408.3         | 6.7     |
| 402.2      | 0.8     | 422.5      | 0.1     | 405.2      | 5.7     | 389.8           | 0.0     | 388.6        | 36.5    | 428.2       | 39.4    | 429.8         | 38.3    |
| 413.6      | 1.5     | 423.1      | 1.2     | 407.6      | 0.0     | 407.5           | 16.1    | 398.1        | 1.2     | 437.7       | 31.9    | 433.0         | 104.7   |

|        |        |        |        |        |        |        |        |        |        |        |        |        |         |
|--------|--------|--------|--------|--------|--------|--------|--------|--------|--------|--------|--------|--------|---------|
| 423.1  | 1.5    | 444.0  | 8.6    | 413.2  | 5.6    | 418.8  | 6.8    | 410.4  | 7.9    | 444.7  | 8.0    | 441.7  | 0.0     |
| 425.5  | 0.1    | 444.8  | 3.2    | 416.6  | 0.5    | 440.7  | 13.0   | 415.2  | 97.7   | 445.3  | 46.3   | 444.9  | 21.0    |
| 441.8  | 10.0   | 451.4  | 2.2    | 469.0  | 0.1    | 457.1  | 6.1    | 451.0  | 17.3   | 452.7  | 16.2   | 451.2  | 5.9     |
| 442.6  | 7.7    | 451.6  | 19.1   | 477.1  | 1.0    | 467.3  | 0.1    | 453.4  | 22.8   | 456.3  | 21.6   | 457.4  | 2.4     |
| 457.6  | 11.4   | 455.7  | 4.5    | 477.3  | 4.7    | 470.3  | 9.2    | 468.7  | 1.3    | 460.6  | 21.1   | 459.9  | 0.0     |
| 459.2  | 11.6   | 462.7  | 16.4   | 492.3  | 31.0   | 473.5  | 9.3    | 470.9  | 20.6   | 468.7  | 0.1    | 460.6  | 0.4     |
| 459.8  | 12.0   | 463.0  | 11.6   | 495.7  | 0.7    | 473.8  | 6.1    | 479.7  | 0.5    | 483.6  | 0.5    | 463.2  | 0.0     |
| 463.0  | 9.1    | 467.0  | 1.0    | 500.3  | 10.6   | 481.9  | 24.1   | 492.7  | 6.8    | 494.6  | 2.4    | 484.8  | 33.6    |
| 524.5  | 9.3    | 502.3  | 5.4    | 530.3  | 8.8    | 504.1  | 0.0    | 494.2  | 205.7  | 546.2  | 1.0    | 520.2  | 60.0    |
| 525.9  | 11.3   | 503.7  | 7.5    | 531.1  | 3.2    | 520.3  | 0.0    | 513.1  | 167.6  | 546.6  | 28.8   | 524.0  | 0.0     |
| 533.0  | 7.0    | 549.0  | 16.2   | 542.9  | 2.3    | 523.4  | 0.0    | 522.2  | 1.3    | 548.8  | 2.9    | 568.4  | 46.9    |
| 534.4  | 15.5   | 549.6  | 2.8    | 552.1  | 111.6  | 535.5  | 484.9  | 522.6  | 1.1    | 552.7  | 33.0   | 573.8  | 0.0     |
| 560.7  | 0.2    | 557.4  | 0.4    | 562.2  | 1.5    | 536.0  | 23.4   | 539.0  | 75.3   | 581.4  | 7.8    | 586.0  | 0.0     |
| 560.9  | 0.6    | 558.0  | 0.5    | 566.1  | 0.4    | 548.3  | 88.5   | 550.8  | 13.2   | 586.9  | 1.1    | 588.4  | 3.1     |
| 621.5  | 38.7   | 613.2  | 117.0  | 571.5  | 180.0  | 553.5  | 59.3   | 552.9  | 72.0   | 598.8  | 101.1  | 592.3  | 44.0    |
| 624.3  | 13.2   | 613.4  | 23.4   | 575.1  | 101.4  | 556.4  | 45.7   | 560.4  | 166.3  | 599.2  | 128.1  | 599.0  | 56.0    |
| 627.1  | 147.6  | 629.0  | 80.0   | 576.0  | 171.4  | 560.1  | 8.1    | 563.5  | 15.4   | 611.1  | 96.4   | 602.0  | 14.2    |
| 628.8  | 149.7  | 632.4  | 129.9  | 587.7  | 35.3   | 560.2  | 52.2   | 567.1  | 6.0    | 619.8  | 274.1  | 604.0  | 73.2    |
| 641.8  | 428.3  | 640.4  | 435.9  | 591.4  | 11.0   | 579.6  | 105.7  | 580.0  | 112.0  | 625.7  | 36.7   | 609.5  | 11.3    |
| 654.4  | 88.6   | 650.4  | 65.1   | 597.2  | 125.9  | 586.1  | 28.6   | 582.7  | 33.5   | 631.3  | 4.7    | 1192.2 | 17881.6 |
| 2095.6 | 32.4   | 2082.8 | 423.2  | 2078.8 | 319.0  | 2049.5 | 442.7  | 2014.0 | 591.6  | 1954.8 | 781.6  | 2004.9 | 330.5   |
| 2101.5 | 151.2  | 2097.8 | 758.7  | 2080.0 | 187.4  | 2072.2 | 503.0  | 2047.6 | 302.4  | 2047.8 | 435.4  | 2038.0 | 78.0    |
| 2110.1 | 530.6  | 2100.4 | 480.2  | 2108.1 | 267.5  | 2072.5 | 58.8   | 2072.7 | 376.2  | 2089.8 | 330.0  | 2086.0 | 1448.3  |
| 2125.1 | 584.4  | 2115.1 | 334.4  | 2122.4 | 5.4    | 2104.7 | 10.6   | 2127.0 | 88.4   | 2112.9 | 172.5  | 2116.8 | 12.1    |
| 2126.0 | 1032.7 | 2120.5 | 88.4   | 2125.4 | 160.8  | 2122.4 | 1169.7 | 2129.0 | 159.5  | 2129.9 | 2.8    | 2120.9 | 0.0     |
| 2129.1 | 361.0  | 2136.1 | 420.8  | 2137.3 | 78.8   | 2141.7 | 502.7  | 2149.4 | 117.1  | 2134.1 | 230.9  | 2135.4 | 238.7   |
| 2139.1 | 1894.3 | 2144.1 | 82.3   | 2142.4 | 1619.9 | 2143.4 | 78.1   | 2150.9 | 1915.1 | 2146.5 | 92.4   | 2137.2 | 0.6     |
| 2150.5 | 35.4   | 2147.6 | 2596.0 | 2143.2 | 37.0   | 2156.4 | 1512.4 | 2152.7 | 1398.9 | 2155.5 | 36.6   | 2146.8 | 7.5     |
| 2152.2 | 421.5  | 2153.4 | 433.5  | 2146.0 | 546.2  | 2158.2 | 884.7  | 2157.3 | 100.4  | 2158.2 | 2264.4 | 2151.8 | 2392.9  |
| 2168.1 | 910.1  | 2161.4 | 431.8  | 2164.5 | 2028.7 | 2168.2 | 37.3   | 2163.1 | 387.1  | 2162.8 | 1596.0 | 2159.8 | 1408.5  |
| 2194.3 | 755.4  | 2191.9 | 832.4  | 2167.2 | 1692.0 | 2184.8 | 1484.1 | 2191.3 | 1277.3 | 2170.4 | 1205.4 | 2207.5 | 2.9     |
| 2211.4 | 0.7    | 2210.9 | 6.7    | 2206.3 | 0.0    | 2214.7 | 119.3  | 2212.4 | 25.3   | 2214.1 | 12.9   | 2368.5 | 8512.1  |

Table S5. Cartesian Coordinates of the Optimized Structures:

$\text{Fe}(\text{CO})_5^+$

$\text{C}_{4v}, ^2\text{A}_1$

|    |           |           |           |
|----|-----------|-----------|-----------|
| Fe | 0.000000  | 0.000000  | 0.213134  |
| C  | 0.000000  | 1.885952  | 0.425413  |
| O  | 0.000000  | 3.013774  | 0.548123  |
| C  | 1.885952  | 0.000000  | 0.425413  |
| O  | 3.013774  | 0.000000  | 0.548123  |
| C  | 0.000000  | -1.885952 | 0.425413  |
| O  | 0.000000  | -3.013774 | 0.548123  |
| C  | 0.000000  | 0.000000  | -1.729427 |
| O  | 0.000000  | 0.000000  | -2.864346 |
| C  | -1.885952 | 0.000000  | 0.425413  |
| O  | -3.013774 | 0.000000  | 0.548123  |

$\text{Fe}(\text{CO})_6^+$ :

$\text{C}_{4v}, ^2\text{A}_1$

|    |                 |                 |                 |
|----|-----------------|-----------------|-----------------|
| Fe | 0.000000000000  | 0.000000000000  | 0.306416850000  |
| C  | 0.000000000000  | 1.885967900000  | 0.103524030000  |
| O  | 0.000000000000  | 3.014923940000  | -0.013785870000 |
| C  | 1.885967900000  | 0.000000000000  | 0.103524030000  |
| O  | 3.014923940000  | 0.000000000000  | -0.013785870000 |
| C  | -1.885967900000 | 0.000000000000  | 0.103524030000  |
| O  | -3.014923940000 | 0.000000000000  | -0.013785870000 |
| C  | 0.000000000000  | 0.000000000000  | 2.261357850000  |
| O  | 0.000000000000  | 0.000000000000  | 3.396650850000  |
| C  | 0.000000000000  | 0.000000000000  | -2.977987150000 |
| O  | 0.000000000000  | 0.000000000000  | -4.110181150000 |
| C  | 0.000000000000  | -1.885967900000 | 0.103524030000  |
| O  | 0.000000000000  | -3.014923940000 | -0.013785870000 |

$\text{Fe}_2\text{CO}_8^+$ :

$\text{C}_s, ^4\text{A}''$

|   |                 |                 |                 |
|---|-----------------|-----------------|-----------------|
| C | -1.575630864676 | -2.384517503254 | 0.000000000000  |
| O | -2.537231415053 | -2.990281280627 | 0.000000000000  |
| C | -0.177194285636 | 3.173308112910  | 0.000000000000  |
| O | -0.264919409751 | 4.308614430294  | 0.000000000000  |
| C | -1.302326114704 | 0.972102033531  | 1.298167584662  |
| O | -2.089898022421 | 0.786700580895  | 2.105818900013  |
| C | -1.302326114704 | 0.972102033531  | -1.298167584662 |
| O | -2.089898022421 | 0.786700580895  | -2.105818900013 |
| C | 1.276677124180  | 1.170695315572  | -1.291089876591 |
| O | 2.091221313437  | 1.115643595706  | -2.091508217149 |
| C | 1.276677124180  | 1.170695315572  | 1.291089876591  |
| O | 2.091221313437  | 1.115643595706  | 2.091508217149  |
| C | 0.852140165890  | -2.267196026440 | 1.635392926762  |
| O | 1.235311050432  | -2.760807152707 | 2.584544093858  |
| C | 0.852140165890  | -2.267196026440 | -1.635392926762 |



|    |                 |                 |                 |
|----|-----------------|-----------------|-----------------|
| O  | 1.235311050432  | -2.760807152707 | -2.584544093858 |
| Fe | 0.159310107037  | -1.321202663626 | 0.000000000000  |
| Fe | -0.035074955777 | 1.319232774798  | 0.000000000000  |

$C_{2v}, ^2B_1$

|    |                 |                 |                 |
|----|-----------------|-----------------|-----------------|
| Fe | 0.000000000000  | 0.000000000000  | 1.189443877774  |
| Fe | 0.000000000000  | 0.000000000000  | -1.259161303097 |
| C  | 1.283086151430  | 0.000000000000  | -2.570441681515 |
| O  | 2.140689262815  | 0.000000000000  | -3.319861532793 |
| C  | 0.000000000000  | 1.461056709468  | 2.409715094483  |
| O  | 0.000000000000  | 2.341834947353  | 3.131853260818  |
| C  | 0.000000000000  | 1.818977765836  | -0.860876065500 |
| O  | 0.000000000000  | 2.955819389902  | -0.740987877498 |
| C  | 1.848355472865  | 0.000000000000  | 1.059261809377  |
| O  | 2.990290984774  | 0.000000000000  | 1.012839255288  |
| C  | 0.000000000000  | -1.461056709468 | 2.409715094483  |
| O  | 0.000000000000  | -2.341834947353 | 3.131853260818  |
| C  | -1.848355472865 | 0.000000000000  | 1.059261809377  |
| O  | -2.990290984774 | 0.000000000000  | 1.012839255288  |
| C  | -1.283086151430 | 0.000000000000  | -2.570441681515 |
| O  | -2.140689262815 | 0.000000000000  | -3.319861532793 |
| C  | 0.000000000000  | -1.818977765836 | -0.860876065500 |
| O  | 0.000000000000  | -2.955819389902 | -0.740987877498 |

$D_{2d}, ^2A$

|    |             |             |             |
|----|-------------|-------------|-------------|
| Fe | 0.000000    | 0.000000    | 1.20909063  |
| Fe | 0.000000    | 0.000000    | -1.20909063 |
| C  | -1.83769471 | 0.000000    | -0.93906958 |
| O  | -2.97650945 | 0.000000    | -0.83919241 |
| C  | 0.000000    | 1.83769471  | 0.93906958  |
| O  | 0.000000    | 2.97650945  | 0.83919241  |
| C  | -1.37403938 | 0.000000    | 2.48939961  |
| O  | -2.24039518 | 0.000000    | 3.22786618  |
| C  | 0.000000    | -1.83769471 | 0.93906958  |
| O  | 0.000000    | -2.97650945 | 0.83919241  |
| C  | 1.37403938  | 0.000000    | 2.48939961  |
| O  | 2.24039518  | 0.000000    | 3.22786618  |
| C  | 1.83769471  | 0.000000    | -0.93906958 |
| O  | 2.97650945  | 0.000000    | -0.83919241 |
| C  | 0.000000    | 1.37403938  | -2.48939961 |
| O  | 0.000000    | 2.24039518  | -3.22786618 |
| C  | 0.000000    | -1.37403938 | -2.48939961 |
| O  | 0.000000    | -2.24039518 | -3.22786618 |

$C_{2v}, ^4B_1$

|    |             |             |             |
|----|-------------|-------------|-------------|
| Fe | 0.000000    | 1.26385011  | -0.33636867 |
| Fe | 0.000000    | -1.26385011 | -0.33636867 |
| C  | -1.34533735 | -2.29558026 | -1.16920498 |
| C  | 1.34533735  | -2.29558026 | -1.16920498 |

|   |             |             |             |
|---|-------------|-------------|-------------|
| C | -1.34533735 | 2.29558026  | -1.16920498 |
| C | 1.34533735  | 2.29558026  | -1.16920498 |
| O | -2.1527085  | -2.92345835 | -1.66830301 |
| O | -2.1527085  | 2.92345835  | -1.66830301 |
| O | 2.1527085   | 2.92345835  | -1.66830301 |
| O | 2.1527085   | -2.92345835 | -1.66830301 |
| C | 1.45738322  | 0.000000    | 0.30494817  |
| C | -1.45738322 | 0.000000    | 0.30494817  |
| O | 2.51764043  | 0.000000    | 0.76193107  |
| O | -2.51764043 | 0.000000    | 0.76193107  |
| C | 0.000000    | 2.17913718  | 1.33218621  |
| C | 0.000000    | -2.17913718 | 1.33218621  |
| O | 0.000000    | 2.75294777  | 2.31602338  |
| O | 0.000000    | -2.75294777 | 2.31602338  |

Fe<sub>2</sub>(CO)<sub>9</sub><sup>+</sup>:

C<sub>2v</sub>, <sup>1</sup>B<sub>1</sub>

|    |                 |                 |                 |
|----|-----------------|-----------------|-----------------|
| Fe | 0.000000000000  | 0.000000000000  | -1.447005975187 |
| Fe | 0.000000000000  | 0.000000000000  | 1.413390785203  |
| C  | 0.000000000000  | 1.855487032054  | 1.398099787115  |
| O  | 0.000000000000  | 2.996037209674  | 1.458314850231  |
| C  | 1.316736811159  | -1.289122788005 | -1.242546991478 |
| O  | 2.139451393393  | -2.076175841661 | -1.163161761622 |
| C  | 0.000000000000  | 0.000000000000  | -3.300450300038 |
| O  | 0.000000000000  | 0.000000000000  | -4.438803770176 |
| C  | -1.316736811159 | 1.289122788005  | -1.242546991478 |
| O  | -2.139451393393 | 2.076175841661  | -1.163161761622 |
| C  | -1.316736811159 | -1.289122788005 | -1.242546991478 |
| O  | -2.139451393393 | -2.076175841661 | -1.163161761622 |
| C  | 0.000000000000  | -1.855487032054 | 1.398099787115  |
| O  | 0.000000000000  | -2.996037209674 | 1.458314850231  |
| C  | 1.481699190151  | 0.000000000000  | 2.568637088730  |
| O  | 2.381208860870  | 0.000000000000  | 3.269633090223  |
| C  | -1.481699190151 | 0.000000000000  | 2.568637088730  |
| O  | -2.381208860870 | 0.000000000000  | 3.269633090223  |
| C  | 1.316736811159  | 1.289122788005  | -1.242546991478 |
| O  | 2.139451393393  | 2.076175841661  | -1.163161761622 |

C<sub>4v</sub>, <sup>2</sup>A<sub>1</sub>

|    |             |             |             |
|----|-------------|-------------|-------------|
| Fe | 0.000000    | 0.000000    | -1.79721995 |
| Fe | 0.000000    | 0.000000    | 1.27647947  |
| C  | 1.32285831  | -1.32285831 | -1.91593646 |
| C  | 1.32285831  | 1.32285831  | -1.91593646 |
| C  | -1.32285831 | 1.32285831  | -1.91593646 |
| C  | 1.32285831  | -1.32285831 | -1.91593646 |
| O  | -2.12629122 | -2.12629122 | -2.00462382 |
| O  | 2.12629122  | -2.12629122 | -2.00462382 |
| O  | 2.12629122  | 2.12629122  | -2.00462382 |

|   |             |             |             |
|---|-------------|-------------|-------------|
| O | -2.12629122 | 2.12629122  | -2.00462382 |
| C | 0.000000    | 1.8304273   | 1.03404621  |
| C | 1.8304273   | 0.000000    | 1.03404621  |
| C | 0.000000    | -1.8304273  | 1.03404621  |
| C | -1.8304273  | 0.000000    | 1.03404621  |
| O | 0.000000    | 2.96809238  | 0.91901647  |
| O | 2.96809238  | 0.000000    | 0.91901647  |
| O | 0.000000    | -2.96809238 | 0.91901647  |
| O | -2.96809238 | 0.000000    | 0.91901647  |
| C | 0.000000    | 0.000000    | 3.1235757   |
| O | 0.000000    | 0.000000    | 4.26303122  |

$C_{4v}, ^2A_1$

|    |                 |                 |                 |
|----|-----------------|-----------------|-----------------|
| Fe | 0.000000000000  | 0.000000000000  | 1.794706019747  |
| Fe | 0.000000000000  | 0.000000000000  | -1.436651650286 |
| C  | 0.000000000000  | -1.870393878785 | 1.921736760600  |
| O  | 0.000000000000  | -3.003681575437 | 2.038855749652  |
| C  | -1.870393878785 | 0.000000000000  | 1.921736760600  |
| O  | -3.003681575437 | 0.000000000000  | 2.038855749652  |
| C  | 0.000000000000  | 1.870393878785  | 1.921736760600  |
| O  | 0.000000000000  | 3.003681575437  | 2.038855749652  |
| C  | 1.870393878785  | 0.000000000000  | 1.921736760600  |
| O  | 3.003681575437  | 0.000000000000  | 2.038855749652  |
| C  | 0.000000000000  | 1.832780763250  | -1.214948254588 |
| O  | 0.000000000000  | 2.973867040321  | -1.140017117324 |
| C  | -1.832780763250 | 0.000000000000  | -1.214948254588 |
| O  | -2.973867040321 | 0.000000000000  | -1.140017117324 |
| C  | 0.000000000000  | -1.832780763250 | -1.214948254588 |
| O  | 0.000000000000  | -2.973867040321 | -1.140017117324 |
| C  | 1.832780763250  | 0.000000000000  | -1.214948254588 |
| O  | 2.973867040321  | 0.000000000000  | -1.140017117324 |
| C  | 0.000000000000  | 0.000000000000  | -3.279753850899 |
| O  | 0.000000000000  | 0.000000000000  | -4.419581359919 |

$Fe_3(CO)_{12}^+$

$C_1, ^4A$

|    |                 |                 |                 |
|----|-----------------|-----------------|-----------------|
| Fe | -2.544690197202 | -0.389972134095 | -0.076579227980 |
| Fe | -0.006335953376 | 0.928929044758  | 0.102923978538  |
| C  | -2.958984572997 | 0.526042245315  | 1.467885695983  |
| O  | -3.243196771919 | 1.086310343603  | 2.423918291283  |
| C  | -4.107885392821 | -1.353043261612 | -0.297247678035 |
| O  | -5.067937563530 | -1.952524549930 | -0.436368724003 |
| C  | -1.623227712042 | -0.950113005672 | -1.558507608301 |
| O  | -1.080735640273 | -1.304637271706 | -2.505287653480 |
| C  | -3.053186222123 | 1.110733014916  | -1.020095982575 |
| O  | -3.390607867041 | 2.036511231035  | -1.600310285604 |
| C  | 0.032627688956  | 2.213739414002  | -1.374304323684 |
| O  | 0.056059936972  | 2.942725404213  | -2.251448582197 |
| C  | -0.012063044367 | 1.868045395424  | 1.822303884146  |

|                                 |                 |                 |                 |
|---------------------------------|-----------------|-----------------|-----------------|
| O                               | -0.012877245836 | 2.393394417094  | 2.834925240826  |
| C                               | -1.655501493759 | -1.612064924240 | 0.965396969138  |
| O                               | -1.130488002007 | -2.377676559165 | 1.636650024067  |
| Fe                              | 2.534705186572  | -0.428409803662 | -0.008479088343 |
| C                               | 3.015198935385  | 1.310336162961  | 0.359922560160  |
| O                               | 3.335897411330  | 2.385902744633  | 0.585182551538  |
| C                               | 4.235434830623  | -1.153815990925 | 0.001857417874  |
| O                               | 5.284906584936  | -1.600019720847 | 0.009888931848  |
| C                               | 1.618357370864  | -1.972127440227 | -0.394851128251 |
| O                               | 1.075883941489  | -2.949231441829 | -0.643218732276 |
| C                               | 2.099191824553  | -0.660450361206 | 1.762488216999  |
| O                               | 1.855587106663  | -0.825046332305 | 2.869629834251  |
| C                               | 2.411261820232  | 0.018624122752  | -1.789956870323 |
| O                               | 2.362286933955  | 0.277805415077  | -2.903794439973 |
| C <sub>1</sub> , <sup>4</sup> A |                 |                 |                 |
| Fe                              | 2.767090619275  | 0.088097621316  | -0.225048895165 |
| Fe                              | -0.001084251695 | -0.013703409528 | 1.154581775838  |
| Fe                              | -2.761903904914 | -0.086941119809 | -0.242161259380 |
| C                               | -0.060319695846 | 1.881181762375  | 1.411314823276  |
| O                               | -0.094192178241 | 3.015003500119  | 1.549953149516  |
| C                               | 3.152703452298  | -1.534113150895 | 0.566569317525  |
| O                               | 3.413349694549  | -2.535496492669 | 1.051095951391  |
| C                               | 4.403948650140  | 0.178907433950  | -1.073018071058 |
| O                               | 5.414839091762  | 0.235019596016  | -1.599334233851 |
| C                               | 2.213648118402  | 1.708306294927  | -0.913043141746 |
| O                               | 1.899585540485  | 2.718293061109  | -1.345699379673 |
| C                               | 1.683159265745  | -0.778921700965 | -1.417398018918 |
| O                               | 1.042275731228  | -1.331731892090 | -2.194276500519 |
| C                               | 0.056910932874  | -1.913615143238 | 1.371241782904  |
| O                               | 0.090270785670  | -3.050141846555 | 1.485719491362  |
| C                               | 3.043987076981  | 0.893357304876  | 1.403240069132  |
| O                               | 3.247224479334  | 1.390920125208  | 2.416442993036  |
| C                               | -3.151934152905 | 1.518488148891  | 0.580757505137  |
| O                               | -3.415285738883 | 2.509689287473  | 1.084392546340  |
| C                               | -4.394528896698 | -0.160294330463 | -1.099916372187 |
| O                               | -5.402862892988 | -0.205571259884 | -1.632165728244 |
| C                               | -2.204791819973 | -1.692440176905 | -0.961024162832 |
| O                               | -1.888432033606 | -2.693163931593 | -1.413073976582 |
| C                               | -1.672004230788 | 0.804898192526  | -1.410510267237 |
| O                               | -1.027289881358 | 1.374103918397  | -2.172231992347 |
| C                               | -3.046552233103 | -0.925876669846 | 1.367630522319  |
| O                               | -3.254585548761 | -1.444722322819 | 2.369150524745  |
| C <sub>2</sub> , <sup>2</sup> A |                 |                 |                 |
| Fe                              | 0.213332002851  | 1.603698252544  | 0.005433205321  |
| Fe                              | 1.250899994655  | -1.026594710874 | 0.040398399755  |
| Fe                              | -1.475702360191 | -0.663647440196 | -0.046285091280 |
| C                               | -2.366980465240 | -2.232125187778 | -0.538221703855 |

|                 |                 |                 |                 |
|-----------------|-----------------|-----------------|-----------------|
| O               | -2.931203471969 | -3.180698540126 | -0.825239736376 |
| C               | -1.982181893095 | 0.220514507323  | -1.598101105157 |
| O               | -2.392115635664 | 0.712643473880  | -2.545557249926 |
| C               | -2.868958335674 | 0.132115754065  | 0.883309676185  |
| O               | -3.738431169711 | 0.619153239687  | 1.440652210778  |
| C               | -0.867239577597 | -1.425989630915 | 1.517470718713  |
| O               | -0.710583682487 | -1.918011292686 | 2.544230039506  |
| C               | 0.655837996063  | 1.452694708460  | -1.778191869196 |
| O               | 0.946731826420  | 1.434448404093  | -2.885344565973 |
| C               | -0.976374485132 | 2.981904432942  | -0.334713882802 |
| O               | -1.699224982720 | 3.840941010535  | -0.544301803641 |
| C               | 1.721565988758  | 2.620779984486  | 0.353757588515  |
| O               | 2.643601919245  | 3.259634174089  | 0.568464598712  |
| C               | -0.254831930970 | 1.561622390382  | 1.788405328688  |
| O               | -0.541357631814 | 1.612598298959  | 2.895675816380  |
| C               | 2.804533171198  | -0.616515809595 | -0.885096396308 |
| O               | 3.771569275452  | -0.369984989415 | -1.439927330382 |
| C               | 1.700736491703  | -2.776768499861 | 0.521009234446  |
| O               | 1.997112039458  | -3.841736814153 | 0.801147911372  |
| C               | 1.969551134693  | -0.316009590573 | 1.597630754295  |
| O               | 2.493069696085  | 0.045460508450  | 2.547980061787  |
| C               | 0.465678782201  | -1.592873002047 | -1.527876072198 |
| O               | 0.186773857113  | -2.019941791126 | -2.557773320014 |
| <br>            |                 |                 |                 |
| $C_{2v}, ^4B_1$ |                 |                 |                 |
| Fe              | 0.144952985388  | -0.013202808155 | 0.002719665781  |
| Fe              | 2.687179533489  | -0.282974533250 | -0.002005324162 |
| Fe              | -2.665156872151 | 0.284889524854  | 0.007801237688  |
| C               | 2.420852027006  | -1.544701562793 | -1.325824220162 |
| O               | 2.285257391933  | -2.329974454633 | -2.146450716181 |
| C               | 0.733511566429  | 1.212604452719  | -1.238767396671 |
| O               | 1.027630715249  | 1.997684236646  | -2.025274302061 |
| C               | 0.467695240799  | -1.335693297134 | 1.242544616794  |
| O               | 0.593403375500  | -2.165293335775 | 2.028298549409  |
| C               | -0.575689435421 | 1.226858160175  | 1.199118609702  |
| O               | -0.740313455774 | 2.030376883179  | 2.006755594379  |
| C               | 2.696385893302  | 1.005935125123  | 1.322371557261  |
| O               | 2.731595423904  | 1.801758514197  | 2.143269116354  |
| C               | 3.775066448025  | -1.445453138762 | 1.004512673791  |
| O               | 4.430402692922  | -2.151365677374 | 1.616339512494  |
| C               | 3.990819166055  | 0.625970500256  | -1.013111608269 |
| O               | 4.777240527802  | 1.179096581745  | -1.627703780917 |
| C               | -0.824155892526 | -1.073973701285 | -1.190611365247 |
| O               | -1.156590771286 | -1.824738020654 | -1.997373923880 |
| C               | -2.730036627556 | -1.055657813250 | 1.304904391955  |
| O               | -2.795475639363 | -1.871902355368 | 2.097313158606  |
| C               | -2.451989678719 | 1.609634221291  | -1.289656859524 |
| O               | -2.347563540281 | 2.421638598360  | -2.082269197185 |
| C               | -3.980127079815 | -0.583624795089 | -1.025369719954 |

|   |                 |                 |                 |
|---|-----------------|-----------------|-----------------|
| O | -4.789789650321 | -1.097493622882 | -1.640147780032 |
| C | -3.764789441100 | 1.409655620438  | 1.045421479391  |
| O | -4.446306903487 | 2.081798697463  | 1.662930030609  |

C<sub>s</sub>, <sup>2</sup>A''

|    |               |               |               |
|----|---------------|---------------|---------------|
| Fe | -2.4466133259 | 0.193080573   | -0.5807842796 |
| Fe | -0.0239444943 | 1.446995486   | -0.2091404395 |
| Fe | 2.4781343875  | 0.3054128876  | -0.0913508316 |
| C  | 4.1558812907  | 0.8993073485  | -0.7178390853 |
| O  | 5.1756890024  | 1.2465266727  | -1.0896534166 |
| C  | 2.9781776058  | -1.3519741459 | 0.6482717616  |
| O  | 3.2935552615  | -2.3545950577 | 1.0901379798  |
| C  | 2.0768922571  | -0.4748197243 | -1.726247618  |
| O  | 1.8574620014  | -0.9625466018 | -2.7350494369 |
| C  | 2.7106585592  | 1.1705463008  | 1.5401966662  |
| O  | 2.8732712187  | 1.6905445455  | 2.5421348055  |
| C  | 1.3435273589  | 2.3991268816  | -0.9897868611 |
| O  | 2.0098485697  | 3.1686386874  | -1.5311264465 |
| C  | -0.0835846875 | -0.1235384883 | 0.7433669377  |
| O  | -0.1338040873 | -1.0347088003 | 1.4561470271  |
| C  | -1.250274337  | 2.3394157047  | -1.2512864387 |
| O  | -1.8295388674 | 3.0795159478  | -1.9189296426 |
| C  | -0.1979261518 | 2.5860712533  | 1.2728851387  |
| O  | -0.3032911822 | 3.2808549958  | 2.1753362802  |
| C  | -3.9908207515 | 0.7145619713  | -1.5316103882 |
| O  | -4.9304694085 | 1.0178011747  | -2.1007297241 |
| C  | -1.6930863045 | -0.5689961404 | -2.095367276  |
| O  | -1.2475355092 | -1.0564168746 | -3.0268422713 |
| C  | -3.0355440109 | 1.0418583328  | 0.9675495362  |
| O  | -3.4162739366 | 1.5503636002  | 1.9147434135  |
| C  | -3.0105805896 | -1.4862412057 | 0.0558558947  |
| O  | -3.3631458686 | -2.5027763247 | 0.4331097147  |

C<sub>s</sub>, <sup>2</sup>A'

|    |                 |                 |                 |
|----|-----------------|-----------------|-----------------|
| Fe | 0.922910001745  | -1.364577984879 | 0.000000000000  |
| Fe | -1.591460142955 | 0.012461273035  | 0.000000000000  |
| Fe | 0.955318520146  | 1.490895701978  | 0.000000000000  |
| C  | -3.366831485226 | -0.383516887725 | 0.000000000000  |
| O  | -4.483827565966 | -0.617566021371 | 0.000000000000  |
| C  | -1.672271589975 | -0.006390856534 | 1.853824892945  |
| O  | -1.804549580440 | -0.008855285876 | 2.987362067296  |
| C  | -1.050175537438 | -1.933754896256 | 0.000000000000  |
| O  | -1.593143684287 | -2.965405471172 | 0.000000000000  |
| C  | -1.672271589975 | -0.006390856534 | -1.853824892945 |
| O  | -1.804549580440 | -0.008855285876 | -2.987362067296 |
| C  | 0.989837103923  | 1.554403033571  | 1.856494256294  |
| O  | 1.038312516211  | 1.670427975188  | 2.992520750251  |
| C  | 2.443721278631  | -0.328872588589 | 0.000000000000  |
| O  | 3.513582618257  | 0.107098220251  | 0.000000000000  |

|   |                 |                 |                 |
|---|-----------------|-----------------|-----------------|
| C | 0.934767503472  | -1.485469423284 | -1.851099307921 |
| O | 0.991375467499  | -1.635323045115 | -2.981231301746 |
| C | 0.934767503472  | -1.485469423284 | 1.851099307921  |
| O | 0.991375467499  | -1.635323045115 | 2.981231301746  |
| C | 1.573065758275  | -3.062747633806 | 0.000000000000  |
| O | 2.004872397278  | -4.119441386354 | 0.000000000000  |
| C | 1.239146984907  | 3.304134703173  | 0.000000000000  |
| O | 1.421603363905  | 4.431866711129  | 0.000000000000  |
| C | 0.989837103923  | 1.554403033571  | -1.856494256294 |
| O | 1.038312516211  | 1.670427975188  | -2.992520750251 |
| C | -1.662390536401 | 1.868927352058  | 0.000000000000  |
| O | -2.007799052250 | 2.964714862627  | 0.000000000000  |

D<sub>3h</sub>, <sup>2</sup>A

|    |           |           |           |
|----|-----------|-----------|-----------|
| Fe | 0.000000  | 0.000000  | 1.562141  |
| Fe | 1.352854  | 0.000000  | -0.781070 |
| Fe | -1.352854 | 0.000000  | -0.781070 |
| C  | 0.000000  | 0.000000  | 3.381691  |
| O  | 0.000000  | 0.000000  | 4.524327  |
| C  | 2.928630  | 0.000000  | -1.690845 |
| O  | 3.918182  | 0.000000  | -2.262163 |
| C  | -2.928630 | 0.000000  | -1.690845 |
| O  | -3.918182 | 0.000000  | -2.262163 |
| C  | 2.016893  | 0.000000  | 1.164454  |
| O  | 3.017076  | 0.000000  | 1.741910  |
| C  | 0.000000  | 0.000000  | -2.328907 |
| O  | 0.000000  | 0.000000  | -3.483820 |
| C  | -2.016893 | 0.000000  | 1.164454  |
| O  | -3.017076 | 0.000000  | 1.741910  |
| C  | 0.000000  | -1.853358 | 1.702241  |
| O  | 0.000000  | -2.978410 | 1.899175  |
| C  | 1.474184  | -1.853358 | -0.851121 |
| O  | 1.644733  | -2.978410 | -0.949587 |
| C  | -1.474184 | -1.853358 | -0.851121 |
| O  | -1.644733 | -2.978410 | -0.949587 |
| C  | 0.000000  | 1.853358  | 1.702241  |
| O  | 0.000000  | 2.978410  | 1.899175  |
| C  | 1.474184  | 1.853358  | -0.851121 |
| O  | 1.644733  | 2.978410  | -0.949587 |
| C  | -1.474184 | 1.853358  | -0.851121 |
| O  | -1.644733 | 2.978410  | -0.949587 |
